# Supplementary material for: Characterization of Shiga Toxin 2a Encoding Bacteriophages Isolated From High-Virulent O145:H25 Shiga Toxin-Producing Escherichia coli
Source: Frontiers journal article supplement (doi:10.3389/fmicb.2021.728116), 2021-09-08
Supplement: Presentation_1.pdf [file Presentation_1.pdf]

**Supplementary Table 1.** Copy number variants (CNV) of the Stx2a phage, ghost phage and *stx2a* gene in each of the eight Norwegian STEC O145:H25 strains.

| Strain name       | CNV       |             |             |                   |
|-------------------|-----------|-------------|-------------|-------------------|
|                   | Strain    | Stx2a phage | Ghost phage | <i>stx2a</i> gene |
| NIPH-O145:H25-001 | 49.11608  | 195.99      | 248.4843    | 33.7837           |
| NIPH-O145:H25-002 | 34.96262  | 119.0602    | 148.0148    | 39.3547           |
| NIPH-O145:H25-003 | 149.06071 | 381.376     | 522.48      | 115.74            |
| NIPH-O145:H25-004 | 121.27959 | 594.628     | 732.161     | 66.679            |
| NIPH-O145:H25-005 | 41.5722   | 201.8236    | 212.152     | 67.399            |
| NIPH-O145:H25-006 | 135.23445 | 620.131     | 762.471     | 75.7725           |
| NIPH-O145:H25-007 | 88.61372  | 415.663     | 543.225     | 48.7342           |
| NIPH-O145:H25-008 | 137.5677  | 698.06      | 811.75      | 79.0918           |

**Supplementary Table 2.** Proteins identified in NIPH-Stx2a-phage and shadow phage by either Prokka or NCBI BLAST.

| <b>NIPH-Stx2a-phage</b>                        | <b>Shadow phage</b>                            |
|------------------------------------------------|------------------------------------------------|
| Integrase IntQ                                 | Integrase                                      |
| Hypothetical protein                           | Hypothetical protein                           |
| Hypothetical protein                           | Exodeoxyribonuclease                           |
| Hypothetical protein                           | Killing protein KilR                           |
| Serine protease                                | Hypothetical protein                           |
| Hypothetical protein                           | Hypothetical protein                           |
| Hypothetical protein                           | Hypothetical protein                           |
| Hypothetical protein                           | Hypothetical protein                           |
| Transcriptional regulator                      | Hypothetical protein                           |
| Phage repressor protein CI                     | Hypothetical protein                           |
| Hypothetical protein                           | Hypothetical protein                           |
| DNA binding protein or putative antirepressor  | Hypothetical protein                           |
| Hypothetical protein                           | Hypothetical protein                           |
| Hypothetical protein                           | Hypothetical protein                           |
| Phage replication protein O                    | Hypothetical protein                           |
| DNA helicase                                   | Hypothetical protein                           |
| Replicative DNA helicase                       | Hypothetical protein                           |
| Hypothetical protein                           | Hypothetical protein                           |
| Hypothetical protein                           | Antiterminator protein Q                       |
| Antiterminator Q                               | Hypothetical protein                           |
| Hypothetical protein                           | Antiterminator Q                               |
| DNA methylase                                  | tRNA-Met                                       |
| tRNA-Met                                       | tRNA-Lys                                       |
| tRNA-Arg                                       | tRNA-Arg                                       |
| tRNA-Arg                                       | Hypothetical protein                           |
| Shiga toxin subunit A                          | Hypothetical protein                           |
| Shiga toxin subunit B                          | 9-O-acetyl-N-acetylneuraminic acid deacetylase |
| 9-O-acetyl-N-acetylneuraminic acid deacetylase | IS66 family transposase ISEc8                  |
| Hypothetical protein                           | TnpB IS66 family insertion sequence element    |
| Hypothetical protein                           | Hypothetical protein                           |
| Putative phage holin protein                   | Hypothetical protein                           |
| Hypothetical protein                           | Lysozyme RrrD                                  |
| Lysozyme RrrD or endolysin                     | Endopeptidase                                  |
| Lysis protein or endopeptidase                 | Hypothetical protein                           |
| Hypothetical protein                           | Hypothetical protein                           |
| Terminase small subunit                        | Dnase                                          |
| Terminase large subunit                        | Phage terminase small subunit                  |
| Hypothetical protein                           | Phage terminase large subunit                  |
| Phage portal protein                           | Hypothetical protein                           |

|                                                |                                                    |
|------------------------------------------------|----------------------------------------------------|
| ATP-dependent Clp protease proteolytic subunit | Hypothetical protein                               |
| Hypothetical protein                           | Portal protein                                     |
| Hypothetical protein                           | Portal protein                                     |
| Minor tail protein Z                           | Hypothetical protein                               |
| Minor tail protein U                           | Head-tail adaptor                                  |
| Tail assembly protein                          | Hypothetical protein                               |
| Minor tail protein                             | Minor tail protein                                 |
| Minor protein                                  | Minor tail protein                                 |
| Tail length tape measure protein               | Tail assembly chaperone                            |
| Minor tail protein                             | Hypothetical protein                               |
| Minor tail protein                             | Tail tape measure protein                          |
| Tail assembly protein                          | Tail protein                                       |
| Tail assembly protein                          | Minor tail protein                                 |
| Phage host specificity protein                 | Phage tail assembly protein                        |
| Outer membrane protein X/ Lom                  | Phage tail assembly protein                        |
| Tail fiber protein                             | Superoxide dismutase [Cu-Zn] 1                     |
| Hypothetical protein                           | Phage host specificity protein                     |
| NleC                                           | Attachment invasion locus protein Lom              |
| DNA damage-inducible protein I                 | Tail fiber protein                                 |
|                                                | Hypothetical protein                               |
|                                                | Hypothetical protein                               |
|                                                | TnpB IS66 family insertion sequence accessory prot |
|                                                | IS66 family transposase ISEc8                      |
|                                                | NleA                                               |
|                                                | Hypothetical protein                               |
|                                                | Hypothetical protein                               |
|                                                | Hypothetical protein                               |
|                                                | Effector protein NleF                              |
|                                                | Hypothetical protein                               |
|                                                | IS3 family transposase ISEc17                      |
|                                                | IS3 family transposase ISEc17                      |
|                                                | EspO                                               |
|                                                | NleG                                               |
|                                                | EspM                                               |
|                                                | Hypothetical protein                               |
|                                                | NleG                                               |

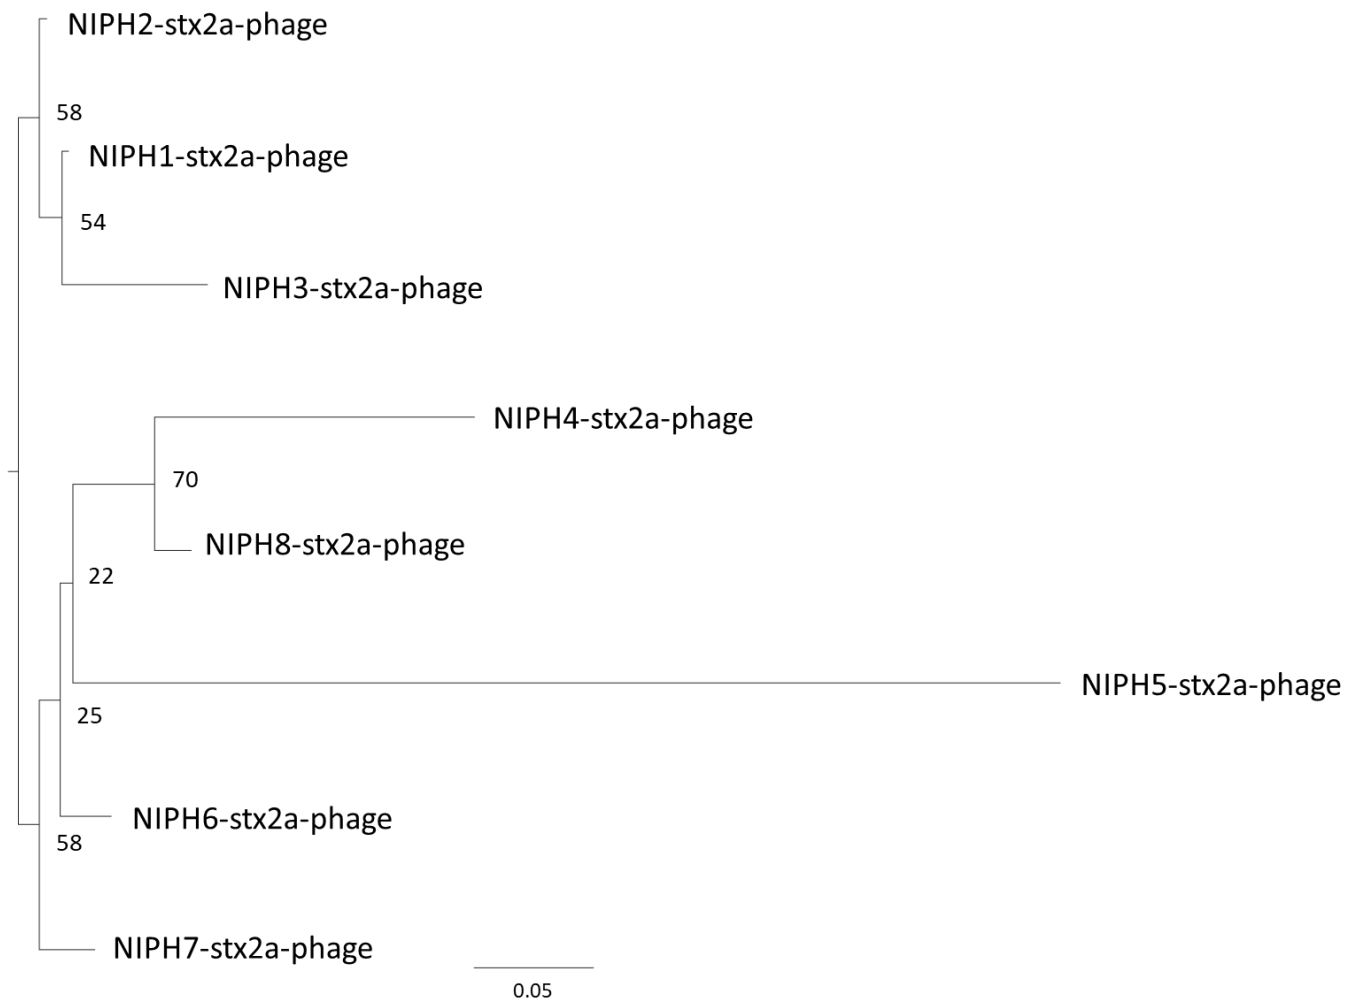

**Supplementary Figure 1.** Maximum likelihood tree of the Stx2a phages of Norwegian O145:H25 STEC (NIPH1-NIPH8) with approximately 200 single nucleotide polymorphisms (SNPs) difference. Shown are MAFFT alignment with ultrafast bootstrap (UFBoot) values generated by IQ-TREE. Values less than 90 are usually not considered significantly different by the UFBoot procedure.

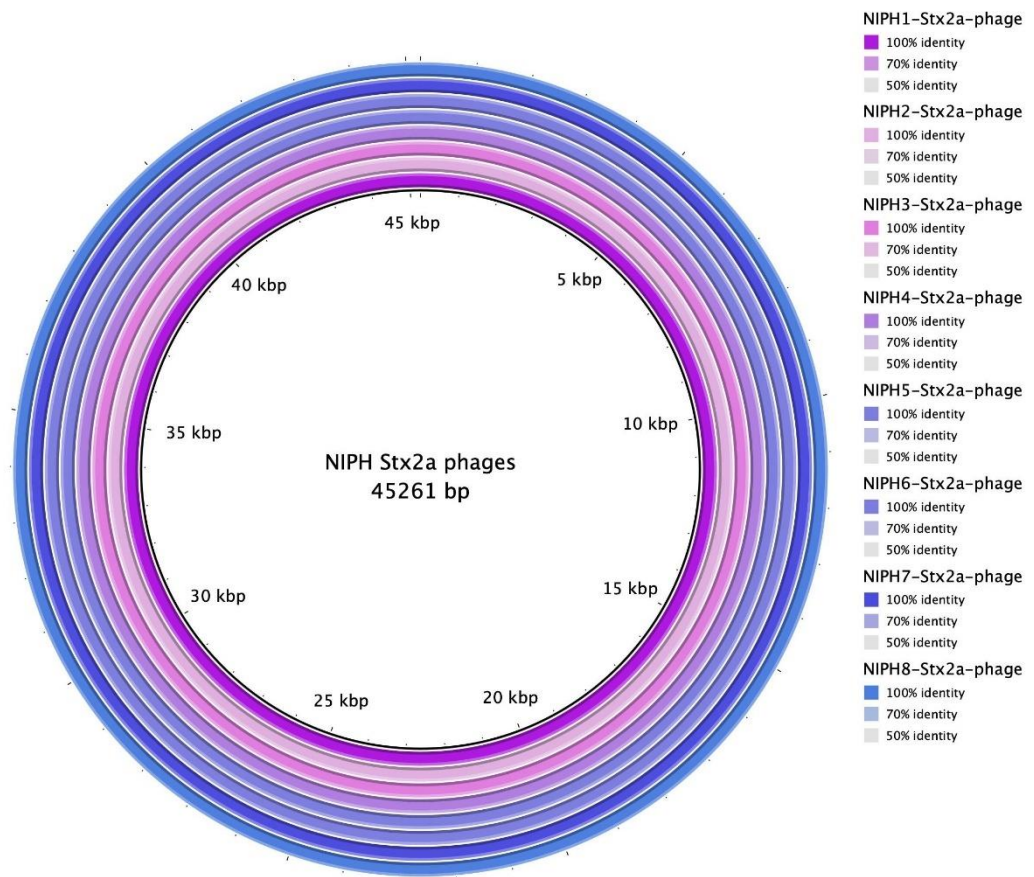

**Supplementary Figure 2.** BLAST Ring Image Generator, BRIG, alignment of the Stx2a phages of Norwegian O145:H25 STEC (NIPH1-NIPH8). The alignment shows high similarity between the Stx2a phages. NIPH1-Stx2a-phage was used as the reference genome, both for the phage assembly and the BRIG alignment.

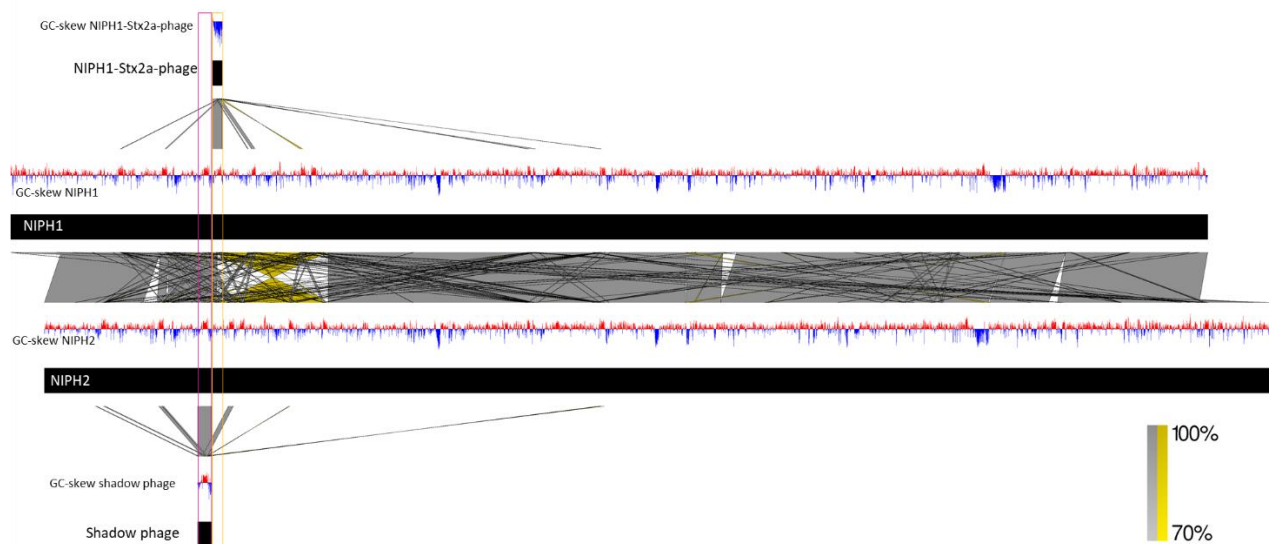

**Supplementary Figure 3.** EasyFig pairwise alignment of the largest contig of NIPH1 (5.4 mbp) with the chromosome of NIPH2 (5.5 mbp) together with NIPH1-Stx2a-phage and the shadow phage alignments, respectively. The genome sequences are shown as thick black vertical lines and above each sequence is the GC-skew shown in red for positive skew (G's abundant on the leading strand) and blue for negative skew (C abundance on the lagging strand). The pink box represents the location of the shadow phage in NIPH1/NIPH2 genome sequences while the yellow box represents the NIPH-Stx2a-phage. The bottom right legend indicates blast hit% (grey) and reverse complemented BLAST hit% (yellow). The inversion (colored yellow) occurring in NIPH2, with respect to NIPH1, splits the Stx2a phage in the middle into two separate parts with approximately 500 kb between them (see text for more details).
